# Supplementary material for: Genome-wide identification, phylogeny, and expression analysis of GRF transcription factors in pineapple (Ananas comosus)
Source: Front Plant Sci. 2023 Apr 14;14:1159223. doi: 10.3389/fpls.2023.1159223 (PMC10140365; doi:10.3389/fpls.2023.1159223)
Supplement: Supplementary file 8 [file Table_4.xlsx]

## Sheet: pineapple-Arabidopsis
Supplementary file 5: One-to-one orthologous relationships between the GRF gene members in pineapple and Arabidopsis
AcGRFs Gene Name	AcGRFs Gene ID	AtGRFs Gene ID	Ka	Ks	Ka/Ks	Selection Pressure
AcGRF1	Aco009479	AT3G13960.1.Araport11.447	0.493933	2.63825	0.18722	Purifying selection
AcGRF2	Aco023268	AT2G06200.2.Araport11.447	0.541923	NaN	NaN	NaN
AcGRF7	Aco013343	AT2G22840.1.Araport11.447	0.473098	2.69434	0.175589	Purifying selection
AcGRF7	Aco013343	AT4G37740.1.Araport11.447	0.429252	NaN	NaN	NaN

## Sheet: pineapple-Vitis_vinifera
Supplementary file 5:One-to-one orthologous relationships between the GRF gene members in pineapple and Vitis vinifera
AcGRFs Gene Name	AcGRFs Gene ID	VvGRFs Gene ID	Ka	Ks	Ka/Ks	Selection Pressure
AcGRF1	Aco009479	VIT_211s0016g01250.1.v2.1	0.383392	1.39398	0.275034	Purifying selection
AcGRF1	Aco009479	VIT_209s0002g01350.1.v2.1	0.442805	1.77827	0.249009	Purifying selection
AcGRF2	Aco023268	VIT_211s0016g01250.1.v2.1	0.378781	1.53588	0.246622	Purifying selection
AcGRF2	Aco023268	VIT_209s0002g01350.1.v2.1	0.313297	1.71908	0.182247	Purifying selection
AcGRF4	Aco015543	VIT_215s0048g01740.2.v2.1	0.517879	1.57026	0.329804	Purifying selection
AcGRF6	Aco000277	VIT_218s0001g08650.1.v2.1	0.317526	2.20956	0.143706	Purifying selection
AcGRF7	Aco013343	VIT_218s0001g08650.1.v2.1	0.321133	1.76221	0.182233	Purifying selection

## Sheet: pineapple-Musa_acuminata
Supplementary file 5: One-to-one orthologous relationships between the GRF gene members in pineapple and Musa acuminata
AcGRFs Gene Name	AcGRFs Gene ID	MaGRFs Gene ID	Ka	Ks	Ka/Ks	Selection Pressure
AcGRF1	Aco009479	GSMUA_Achr1T21940_001.v1	0.378808	1.07692	0.351752	Purifying selection
AcGRF1	Aco009479	GSMUA_Achr8T30640_001.v1	0.358286	1.0387	0.344936	Purifying selection
AcGRF2	Aco023268	GSMUA_Achr1T21940_001.v1	0.387653	1.27628	0.303737	Purifying selection
AcGRF4	Aco015543	GSMUA_Achr11T21590_001.v1	0.188399	0.682235	0.27615	Purifying selection
AcGRF4	Aco015543	GSMUA_Achr5T20170_001.v1	0.213771	0.703287	0.30396	Purifying selection
AcGRF4	Aco015543	GSMUA_Achr8T12060_001.v1	0.230445	0.904579	0.254753	Purifying selection
AcGRF6	Aco000277	GSMUA_Achr7T27480_001.v1	0.272606	1.39185	0.195858	Purifying selection
AcGRF7	Aco013343	GSMUA_Achr1T27000_001.v1	0.315609	1.33976	0.235572	Purifying selection
AcGRF7	Aco013343	GSMUA_Achr3T15140_001.v1	0.277809	1.50866	0.184142	Purifying selection
AcGRF7	Aco013343	GSMUA_Achr7T27480_001.v1	0.279158	1.10254	0.253195	Purifying selection
AcGRF7	Aco013343	GSMUA_Achr8T26530_001.v1	0.259608	1.32022	0.19664	Purifying selection
AcGRF7	Aco013343	GSMUA_Achr8T04970_001.v1	0.275103	1.20824	0.227688	Purifying selection
AcGRF8	Aco013172	GSMUA_Achr1T23840_001.v1	0.234759	1.13298	0.207205	Purifying selection
AcGRF8	Aco013172	GSMUA_Achr2T04650_001.v1	0.242265	1.27095	0.190618	Purifying selection

## Sheet: pineapple-rice
Supplementary file 5: One-to-one orthologous relationships between the GRF gene members in pineapple and rice
AcGRFs Gene Name	AcGRFs Gene ID	OsGRFs Gene ID	Ka	Ks	Ka/Ks	Selection Pressure
AcGRF2	Aco023268	LOC_Os02g53690.1.MSUv7.0	0.250088	1.35701	0.184294	Purifying selection
AcGRF2	Aco023268	LOC_Os06g10310.1.MSUv7.0	0.401413	0.993635	0.403984	Purifying selection
AcGRF4	Aco015543	LOC_Os02g45570.1.MSUv7.0	0.223687	0.766833	0.291702	Purifying selection
AcGRF4	Aco015543	LOC_Os04g48510.1.MSUv7.0	0.250145	0.871976	0.286871	Purifying selection
AcGRF5	Aco015755	LOC_Os07g28430.1.MSUv7.0	0.467709	3.59453	0.130117	Purifying selection
AcGRF6	Aco000277	LOC_Os11g35030.1.MSUv7.0	0.447053	1.55365	0.287744	Purifying selection
AcGRF6	Aco000277	LOC_Os03g51970.1.MSUv7.0	0.298581	1.72952	0.172638	Purifying selection
AcGRF7	Aco013343	LOC_Os03g51970.1.MSUv7.0	0.305493	1.76767	0.172822	Purifying selection
AcGRF8	Aco013172	LOC_Os06g02560.1.MSUv7.0	0.355315	0.937224	0.379114	Purifying selection

## Sheet: pineapple-Sorghum_bicolor
Supplementary file 5: One-to-one orthologous relationships between the GRF gene members in pineapple and Sorghum bicolor
AcGRFs Gene Name	AcGRFs Gene ID	SbiGRFs Gene ID	Ka	Ks	Ka/Ks	Selection Pressure
AcGRF2	Aco023268	Sobic.004G317000.1.v3.1	0.303738	1.49413	0.203288	Purifying selection
AcGRF2	Aco023268	Sobic.010G077200.1.v3.1	0.444416	1.52518	0.291387	Purifying selection
AcGRF4	Aco015543	Sobic.004G282601.1.v3.1	0.272184	0.876306	0.310604	Purifying selection
AcGRF6	Aco000277	Sobic.001G104500.1.v3.1	0.333026	2.07538	0.160465	Purifying selection
AcGRF6	Aco000277	Sobic.005G150900.1.v3.1	0.411176	2.94343	0.139693	Purifying selection
AcGRF7	Aco013343	Sobic.001G104500.1.v3.1	0.376036	1.83013	0.20547	Purifying selection

## Sheet: pineapple-Spirodela_polyrhiza
Supplementary file 5: One-to-one orthologous relationships between the GRF gene members in pineapple and Spirodela polyrhiza
AcGRFs Gene Name	AcGRFs Gene ID	SpipoGRFs Gene ID	Ka	Ks	Ka/Ks	Selection Pressure
AcGRF1	Aco009479	Spipo15G0046500.v2.290	0.37383	1.37056	0.272757	Purifying selection
AcGRF1	Aco009479	Spipo2G0028900.v2.290	0.441394	NaN	NaN	NaN
AcGRF2	Aco023268	Spipo15G0046500.v2.290	0.282726	0.842267	0.335673	Purifying selection
AcGRF2	Aco023268	Spipo2G0028900.v2.290	0.365899	1.11045	0.329505	Purifying selection
AcGRF4	Aco015543	Spipo16G0005500.v2.290	0.316912	0.753888	0.420371	Purifying selection
AcGRF6	Aco000277	Spipo2G0111700.v2.290	0.295633	2.25204	0.131273	Purifying selection
AcGRF7	Aco013343	Spipo2G0111700.v2.290	0.358476	1.90379	0.188296	Purifying selection
AcGRF7	Aco013343	Spipo3G0110400.v2.290	0.219969	1.53366	0.143428	Purifying selection
AcGRF8	Aco013172	Spipo5G0074900.v2.290	0.251361	1.26777	0.198271	Purifying selection
												1

## Sheet: pineapple-water lily
Supplementary file 5: One-to-one orthologous relationships between the GRF gene members in pineapple and water lily
AcGRFs Gene Name	AcGRFs Gene ID	NcGRFs Gene ID	Ka	Ks	Ka/Ks	Selection Pressure
AcGRF1	Aco009479	Nycol.H01165.1.v1.2	0.451113	1.95499	0.230749	Purifying selection
AcGRF3	Aco020046	Nycol.J00529.1.v1.2	0.75794	NaN	NaN	NaN
AcGRF4	Aco015543	Nycol.J00529.1.v1.2	0.372241	1.1533	0.32276	Purifying selection

## Sheet: pineapple-Phalaenopsis equestri
Supplementary file 5: One-to-one orthologous relationships between the GRF gene members in pineapple and Phalaenopsis equestris
AcGRFs Gene Name	AcGRFs Gene ID	PeqGRFs Gene ID	Ka	Ks	Ka/Ks	Selection Pressure
AcGRF1	Aco009479	rna-XM_020726809.1	0.50328	1.35356	0.371818	Purifying selection
AcGRF2	Aco023268	rna-XM_020726809.1	0.223831	2.17266	0.103022	Purifying selection

## Sheet: pineapple-Atrichopoda
Supplementary file 4: One-to-one orthologous relationships between the GRF gene members in pineapple and Amborella trichopoda
AcGRFs Gene Name	AcGRFs Gene ID	AtrGRFs Gene ID	Ka	Ks	Ka/Ks	Selection Pressure
AcGRF1	Aco009479	ATR0598G303.1	0.379668	3.10569	0.122249	Purifying selection
AcGRF2	Aco023268	ATR0598G303.1	0.326004	1.06985	0.30472	Purifying selection
AcGRF4	Aco015543	ATR0757G059.1	0.409214	0.991759	0.412614	Purifying selection
AcGRF7	Aco013343	ATR0739G131.1	0.426281	1.7624	0.241875	Purifying selection
